# Supplementary material for: Convolutional neural networks to predict brain tumor grades and Alzheimer’s disease with MR spectroscopic imaging data
Source: PubMed Central journal article supplement (PMC9401174; doi:10.1371/journal.pone.0268881), 2022-08-24
Supplement: pone.0268881.s001.pdf [file pone.0268881.s001.pdf]

# Convolutional neural networks to predict brain tumor grades and Alzheimer’s disease with MR Spectroscopic Imaging data

Jacopo Acquarelli<sup>1,2\*</sup>, Twan van Laarhoven<sup>1</sup>, Geert J. Postma<sup>2</sup>, Jeroen J. Jansen<sup>2</sup>, Anne Rijpma<sup>3</sup>, Sjaak van Asten<sup>3</sup>, Arend Heerschap<sup>3</sup>, Lutgarde M.C. Buydens<sup>2</sup>, Elena Marchiori<sup>2\*</sup>,

**1** Radboud University Nijmegen, Institute for Computing and Information Science, Nijmegen, The Netherlands

**2** Radboud University Nijmegen, Institute for Molecules and Materials, Nijmegen, The Netherlands

**3** Radboud University Medical Center Nijmegen, Department of Radiology and Nuclear Medicine, Nijmegen, The Netherlands

\* jacquarelli@cs.ru.nl, elenam@cs.ru.nl, Arend.Heerschap@radboudumc.nl

## Hyper-parameters

The hyper-parameters of the SL-CNN model and their range of values (given between brackets), as used in our experiments are:

- number of kernels of the 1D convolutional layer:  $\#kernels_{1D} \in \{4, 8, 16, 32\}$
- size of kernels of the 1D convolutional layer:  $N_{1D} \in \{3, 91\}$
- stride of the 1D convolution:  $s_{1D} \in \{1, 4\}$
- number of kernels of the 2D convolutional layer:  $\#kernels_{2D} \in \{4, 8\}$
- size of kernels of the 2D convolutional layer:  $N_{2D} \in \{3, 5, 7\}$
- stride of the 2D convolution:  $s_{2D} \in \{1, 2\}$
- parameters in the regularization terms:  $\lambda_1, \lambda_2 = 10^n$  where  $n \in \{-4, 4\}$
- learning rate:  $\eta = 10^n$  where  $n \in \{-4, -1\}$

For SVM with RBF kernel we tuned the following terms:

- RBF parameter  $\gamma \in 10^n$  where  $n \in \{-4, 4\}$
- regularization constant  $C \in 10^n$  where  $n \in \{-4, 4\}$

For PLS-DA we used:

- number of latent components  $\#components \in \{1, 20\}$
- different data rescaling methods (mean centering, auto-scaling and log scaling).

For KPLS-DA we used:

- number of latent components  $\#components \in \{1, 20\}$
- RBF parameter  $\gamma \in 10^n$  where  $n \in \{-4, 4\}$
- kernels’ weights  $a_i$  s.t.  $\sum_i a_i K_i = 1$  in the case of multiple ways for the same sample (i.e. the 4 brain areas of Alzheimer’s disease) or multiple types (i.e. spectra and images).

## Tables

| Parameters       | brain tumor     | Alzheimer's disease |
|------------------|-----------------|---------------------|
| $\#kernels_{1D}$ | $16 \pm 11$     | $14 \pm 10$         |
| $N_{1D}$         | $35 \pm 21$     | $35 \pm 19$         |
| $s_{1D}$         | $9 \pm 6$       | $3 \pm 2$           |
| $\#kernels_{2D}$ | $4 \pm 0$       | $4 \pm 1$           |
| $N_{2D}$         | $5 \pm 1$       | $5 \pm 0$           |
| $s_{2D}$         | $2 \pm 1$       | $2 \pm 0$           |
| $\lambda_1$      | $88 \pm 255$    | $120 \pm 305$       |
| $\lambda_2$      | $3 \pm 4$       | $2 \pm 4$           |
| $\eta$           | $0.10 \pm 0.20$ | $0.07 \pm 0.16$     |

**Table S1.** Average hyper-parameter values for SL-CNN selected using RGS-CV.
